# Supplementary material
Source: Springer Nature journal article supplement (https://www.springermedizin.de/resource/supplementary/12884_2012_604_MOESM1_ESM.pdf/9457786)

# MAKING PRAGMATIC CHOICES

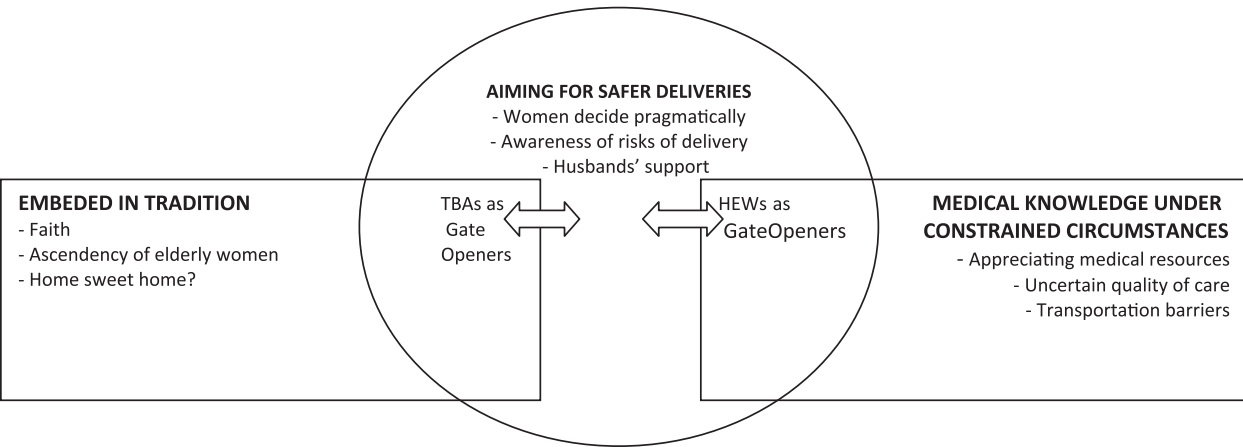

Supplement: MOESM1 [file 9457786]
